# Supplementary material
Source: Springer Nature journal article supplement (https://www.springermedizin.de/resource/supplementary/12936_2010_1283_MOESM1_ESM.pdf/9549402)

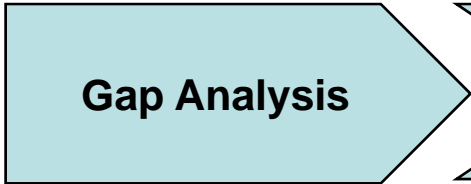

**Jun 09**

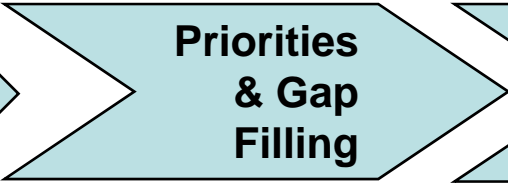

**Oct 09**

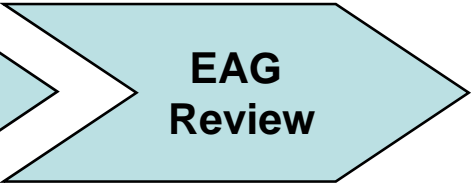

**Nov 09**

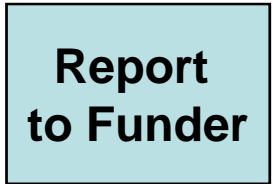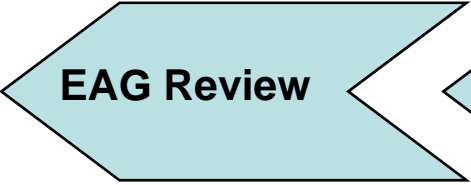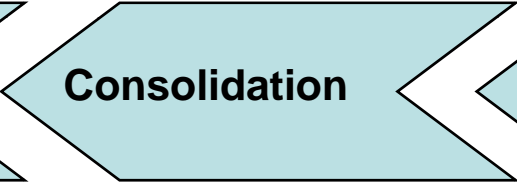

**4Q 10**

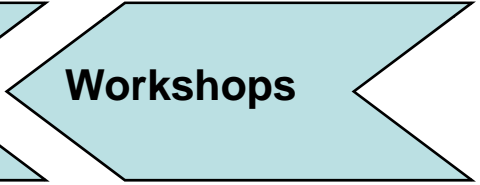

**1/2/3Q 10**

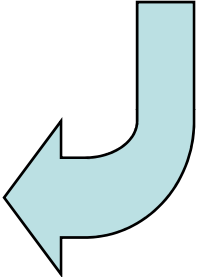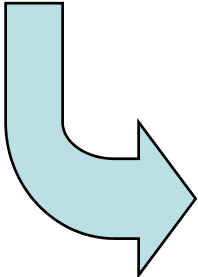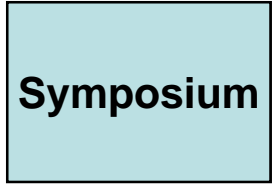

**4Q10  
or 1Q11**

Supplement: MOESM1 [file 9549402]
